# Supplementary material for: The Cost-Effectiveness Analysis of an Integrated Mental Health Care Programme in Germany
Source: MDPI journal article supplement (doi:10.3390/ijerph19116814), 2022-06-02
Supplement: s1 [file s1]

**Table S1:** unit cost list

| <b>Health care service</b>       | <b>unit costs</b>                                            |
|----------------------------------|--------------------------------------------------------------|
| <b>Inpatient</b>                 |                                                              |
| Psychiatric hospital             | 339,71 € per day                                             |
| Somatic hospital                 | 593,04 € per day                                             |
| Psychosomatic hospital           | 339,71 € per day                                             |
| Rehabilitation clinic            | 100,94 € per day                                             |
| <b>Day-care hospital</b>         |                                                              |
| Psychiatric day-care hospital    | 220,81 € per day                                             |
| Somatic day-care hospital        | 385,48 € per day                                             |
| Psychosomatic day-care hospital  | 220,81 € per day                                             |
| <b>Outpatient</b>                |                                                              |
| Medical care centre              | 44,72 € per contact                                          |
| Psychiatric outpatient clinic    | 70,00 € for single contact<br>270,00 € for multiple contacts |
| <b>Practitioner</b>              |                                                              |
| Psychiatrist                     | 44,72 € per contact                                          |
| General practitioner             | 20,06 € per contact                                          |
| Other practitioner               | 38,63 € per contact                                          |
| Psychologist and Psychotherapist | 90,00 € per contact                                          |
| Visiting nurse                   | 29,92 € per hour                                             |
| <b>Complementary</b>             |                                                              |
| Day care centre                  | 55,00 € per day                                              |
| Socio-psychiatric services       | 39,00 € per day                                              |
| Crisis service                   | 73,35 € per hour                                             |
| NWpG services                    | 742,50 € for six months                                      |
| <b>Sonstiges</b>                 |                                                              |
| Occupational therapist           | 23,00 € per hour                                             |
| Nursing service                  | 17,00 € + 4,76 € per hour + travel costs                     |
| Housekeeping help                | 15,92 € + 4,76 € per hour + travel costs                     |
| Physiotherapist                  | 60,00 € per hour                                             |
| Caregiver                        | 34,83 € per hour                                             |
| Voluntary caregiver              | 160,00 € for six months                                      |
| Assisted living                  | 589,10 € per month                                           |
| Sheltered workplace              | 32,75 € per day                                              |

**Table S2:** Description of utilization of NWpG services

|                                                       | <i>n</i> | %     | <i>d</i> | <i>h</i> |
|-------------------------------------------------------|----------|-------|----------|----------|
| Regular contact (personal interview)                  | 257      | 98.8% | 0.44     | 0.50     |
| Regular contact (by e-mail or telephone)              | 172      | 66.2% | 0.25     | -        |
| Regular contact (at patient's home)                   | 32       | 12.3% | 0.10     | 0.13     |
| Network conversation                                  | 35       | 13.5% | 0.08     | 0.13     |
| Group offers (including psychoeducation)              | 26       | 10.0% | 0.58     | 0.84     |
| Mediation of and accompanying to health care services | 21       | 8.1%  | 0.08     | 0.08     |
| Development of a crisis plan                          | 4        | 1.5%  | 0.17     | 0.17     |
| Emergency telephone                                   | 52       | 20.0% | 0.22     | 0.06     |
| Crisis intervention team                              | 40       | 15.4% | 0.16     | 0.17     |
| Emergency appointment with psychiatrist               | 6        | 2.3%  | 0.15     | 0.05     |
| Crisis apartment                                      | 12       | 4.6%  | 0.73     | -        |

*n* = number of patients who used the care service in the reference period (six months before visit 1 to visit 4 (18 months after visit 1)), % = percentage of patients who used the care service in the reference period (six months before visit 1 to visit 4 (18 months after visit 1)), *d* = median of the monthly frequency of use in days (for users only), *h* = median of the frequency of use in hours in (for users only) / all patients who were enrolled in the NWpG program (including care group changers) were included in the analysis.

**Table S3:** Description of utilization of common health care services

|                                                 | total    |       |     |     | TAU      |       |     |     | NWpG     |       |     |     |
|-------------------------------------------------|----------|-------|-----|-----|----------|-------|-----|-----|----------|-------|-----|-----|
|                                                 | <i>n</i> | %     | d   | h   | <i>n</i> | %     | d   | h   | <i>n</i> | %     | d   | h   |
| Psychiatric hospital                            | 60       | 11.7% | 1.9 | -   | 34       | 13.5% | 1.9 | -   | 26       | 10.0% | 1.7 | -   |
| Psychosomatic hospital                          | 18       | 3.5%  | 1.5 | -   | 8        | 3.2%  | 1.2 | -   | 10       | 3.8%  | 1.6 | -   |
| Rehabilitation clinic                           | 29       | 5.7%  | 1.5 | -   | 11       | 4.4%  | 1.5 | -   | 18       | 6.9%  | 1.4 | -   |
| Psychiatric and psychosomatic day-care hospital | 27       | 5.3%  | 2.7 | -   | 13       | 5.2%  | 3.0 | -   | 14       | 5.4%  | 2.6 | -   |
| Psychiatrists. psychiatric outpatient clinic.   |          |       |     |     |          |       |     |     |          |       |     |     |
| medical care centre                             | 449      | 87.9% | 0.6 | 0.2 | 236      | 94.0% | 0.7 | 0.2 | 213      | 81.9% | 0.5 | 0.2 |
| General practitioner                            | 395      | 77.3% | 0.4 | 0.1 | 189      | 75.3% | 0.4 | 0.1 | 206      | 79.2% | 0.4 | 0.1 |
| Other practitioner                              | 299      | 58.5% | 0.5 | 0.2 | 139      | 55.4% | 0.5 | 0.2 | 160      | 61.5% | 0.5 | 0.2 |
| Psychologist and Psychotherapist                | 277      | 54.2% | 1.4 | 1.2 | 113      | 45.0% | 1.4 | 1.2 | 164      | 63.1% | 1.4 | 1.2 |
| Day care centre. socio-psychiatric services     | 190      | 37.2% | 2.1 | 3.1 | 129      | 51.4% | 3.2 | 5.0 | 61       | 23.5% | 1.1 | 1.2 |
| Occupational therapist                          | 73       | 14.3% | 1.4 | 1.7 | 41       | 16.3% | 1.9 | 2.5 | 32       | 12.3% | 1.2 | 1.4 |
| Crisis service (including apartment)            | 8        | 1.6%  | 0.3 | 0.5 | 7        | 2.8%  | 0.3 | 0.8 | 1        | 0.4%  | 0.1 | 0.0 |
| Assisted living                                 | 45       | 8.8%  | 4.0 | 5.0 | 36       | 14.3% | 4.1 | 5.2 | 9        | 3.5%  | 2.2 | 2.7 |
| Sheltered workplace                             | 65       | 12.7% | 1.6 | 2.6 | 40       | 15.9% | 2.0 | 4.5 | 25       | 9.6%  | 1.1 | 2.0 |
| Somatic hospital                                | 112      | 21.9% | 0.2 | -   | 58       | 23.1% | 0.2 | -   | 54       | 20.8% | 0.3 | -   |

*n* = number of patients who used the care service in the reference period (six months before visit 1 to visit 4 (18 months after visit 1)), % = percentage of patients who used the care service in the reference period (six months before visit 1 to visit 4 (18 months after visit 1)), d = median of the monthly frequency of use in days (for users only), h = median of the frequency of use in hours in (for users only)

**Table S4:** Results of the seemingly unrelated regression (SURE) model for cost and QALY differences adjusted for propensity scores

Seemingly unrelated regression

| Equation      | Obs | Params | RMSE     | "R-squared" | chi2  | P>chi2 |
|---------------|-----|--------|----------|-------------|-------|--------|
| tcost12itt~21 | 453 | 2      | 19644.85 | 0.1346      | 70.48 | 0.0000 |
| qaly12itt     | 453 | 2      | .1929575 | 0.0210      | 9.70  | 0.0078 |

|                 | Observed<br>coefficient | Bootstrap<br>std. err. | z     | P> z  | Normal-based<br>[95% conf. interval] |          |
|-----------------|-------------------------|------------------------|-------|-------|--------------------------------------|----------|
| tcost12ittinf21 |                         |                        |       |       |                                      |          |
| iv              | -1183.037               | 2085.359               | -0.57 | 0.571 | -5270.266                            | 2904.192 |
| pst             | -31369.13               | 4385.299               | -7.15 | 0.000 | -39964.16                            | -22774.1 |
| _cons           | 38655.53                | 2181.284               | 17.72 | 0.000 | 34380.29                             | 42930.77 |
| qaly12itt       |                         |                        |       |       |                                      |          |
| iv              | -.0066522               | .020483                | -0.32 | 0.745 | -.0467982                            | .0334937 |
| pst             | .1246645                | .0430737               | 2.89  | 0.004 | .0402416                             | .2090874 |
| _cons           | .7338044                | .0214252               | 34.25 | 0.000 | .6918117                             | .775797  |

Correlation matrix of residuals:

|                 |                 |           |
|-----------------|-----------------|-----------|
|                 | tcost12ittinf21 | qaly12itt |
| tcost12ittinf21 | 1.0000          |           |
| qaly12itt       | -0.2424         | 1.0000    |
